# Supplementary material for: Two-dimensional flower-shaped Au@Ag nanoparticle arrays as effective SERS substrates with high sensitivity and reproducibility for detection of thiram
Source: Royal Society of Chemistry journal article supplement (doi:10.1039/c9tc06577f), 2020-01-01
Supplement: c9tc06577f1.pdf [file c9tc06577f1.pdf]

## Electronic Supplementary Information

### Two-dimension Flower-Shaped Au@Ag Nanoparticle arrays As Reproducible and Highly Sensitive SERS Substrates for Detection of Pesticide Thiram

Changchang Xing,<sup>a,b</sup> Shichuan Zhong,<sup>a,b</sup> Jie Yu,<sup>a,b</sup> Xuejiao Li,<sup>a,b</sup> An Cao,<sup>a,b</sup> Dandan Men,<sup>\*c</sup> Bo Wu,<sup>d</sup>  
Weiping Cai<sup>a</sup> and Yue Li<sup>\*a</sup>

<sup>a</sup>Key Laboratory of Materials Physics and Anhui Key Laboratory of Nanomaterials and Nanotechnology, Institute  
of Solid State Physics, Hefei Institutes of Physical Science, Chinese Academy of Sciences, Hefei, 230031, China

\*E-mail: yueli@issp.ac.cn

<sup>b</sup>University of Science and Technology of China, Hefei, 230026, China

<sup>c</sup>Jiangxi Key Laboratory of Surface Engineering, Jiangxi Science and Technology Normal University, Nanchang,  
330013, P. R. China E-mail: mendandan1999@126.com

<sup>d</sup> State Key Laboratory of Environment-friendly Energy Materials, Southwest University of Science and  
Technology, Mianyang, 621010, P. R. China

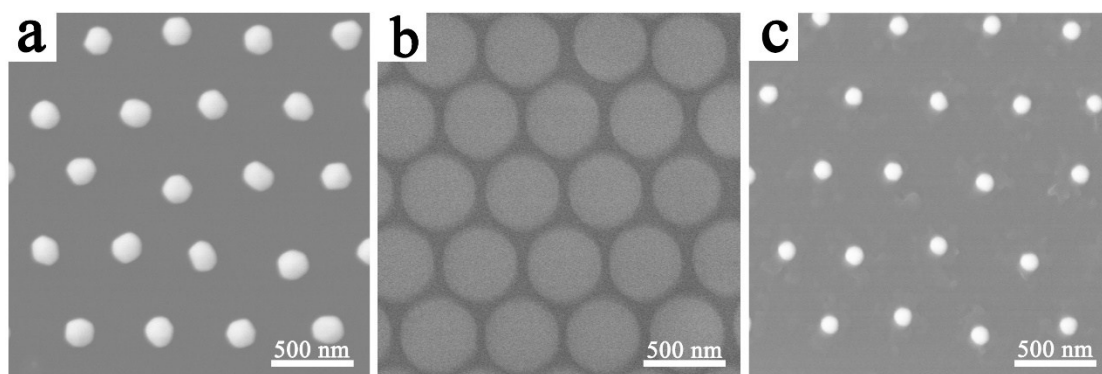

**Fig. S1** SEM images of nanoparticle (NP) arrays as the growth template: (a) the hexagonal non-close-packed (*hncp*) Au NP arrays. (b) the *hncp* polystyrene (PS) colloidal microsphere arrays. (c) the *hncp* Cu NP arrays.

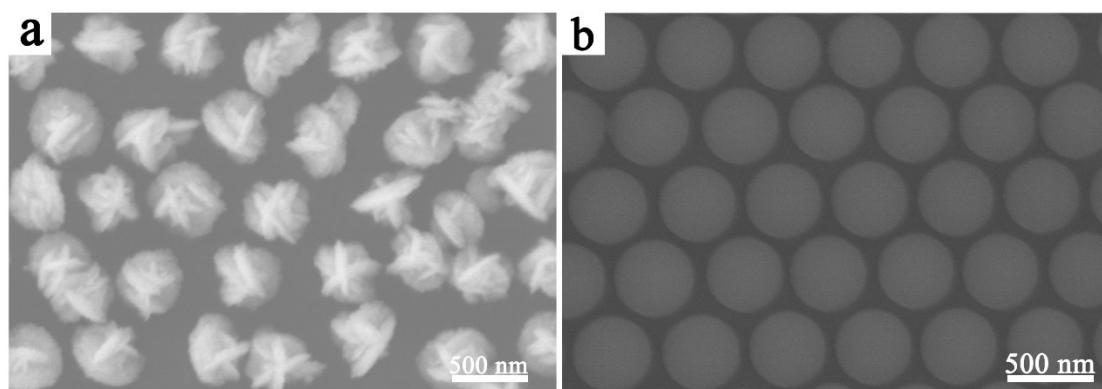

**Fig. S2** (a) SEM image of the flower-shaped Cu@Ag NP arrays using *hncp* Cu NP arrays as the growth template. (b) SEM image of the obtained array without Ag nanosheets grown on it using hexagonally patterned PS colloidal microsphere arrays as the growth template.

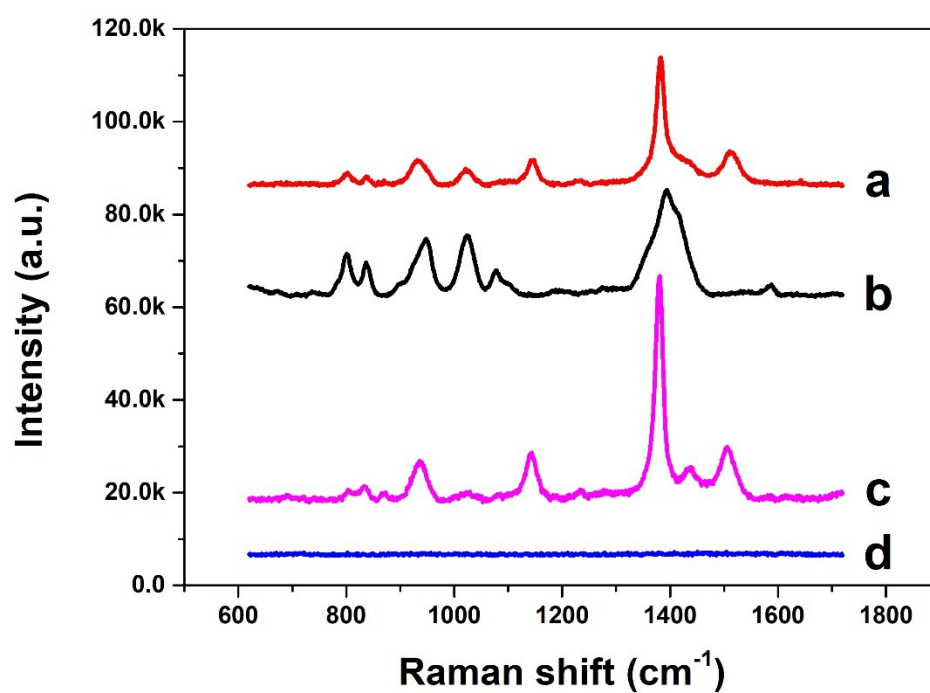

**Fig. S3** SERS spectrum of thiram (a) and Raman spectra (b) of the hexagonally patterned flower-shaped Au@Ag NP arrays with citrate surfactant; SERS spectrum of thiram (c) and Raman spectra (d) of the hexagonally patterned flower-shaped Au@Ag NP arrays soaked with potassium iodide.

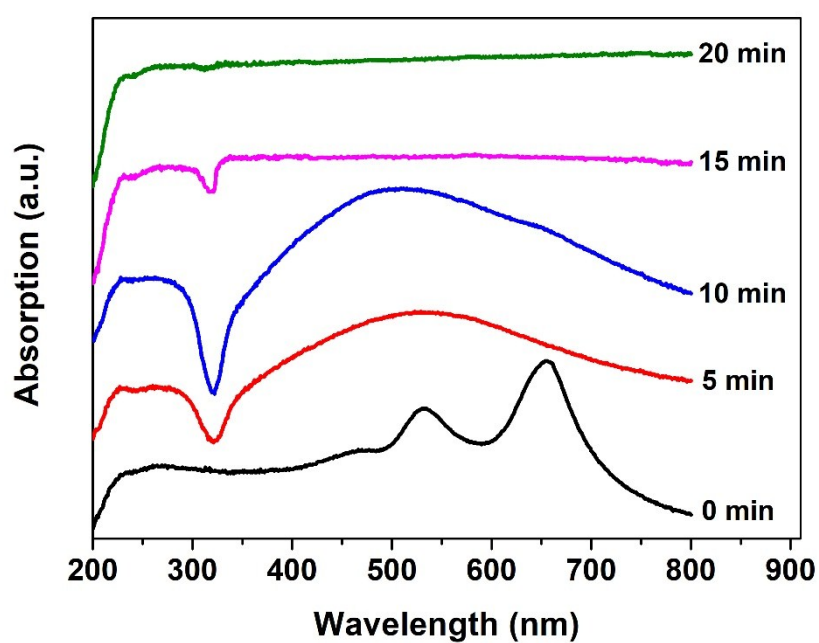

**Fig. S4** The extinction spectra of the *hnep* Au NP arrays (0 min) and the hexagonally patterned flower-shaped Au@Ag NP arrays with different growth time (5-20 min).

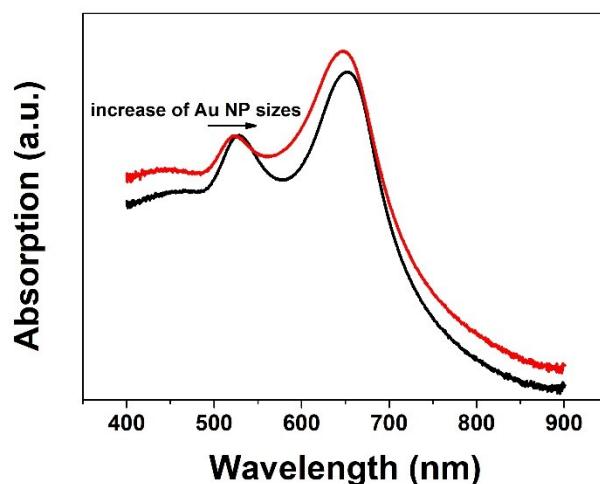

**Fig. S5** The extinction spectra of the *hnep* Au NP arrays with different Au NP sizes (red line of 190 nm and black line of 260 nm in diameter of Au nanoparticles).

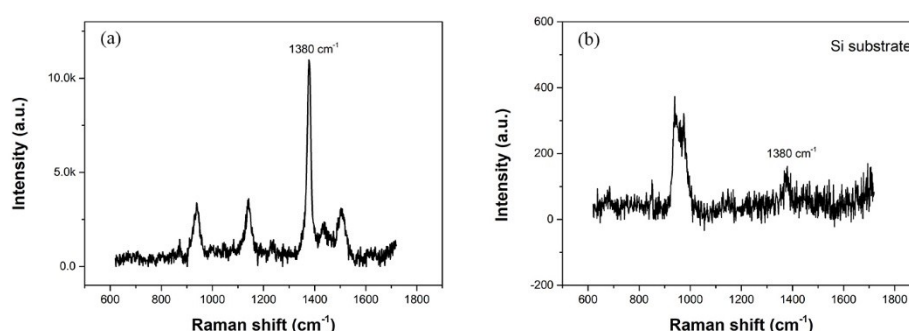

**Fig. S6** (a) Raman signal acquired by dropping 5  $\mu\text{l}$  thiram ethanol solution ( $10^{-7}$  M) on hexagonally patterned flower-shaped Au@Ag NP arrays (area:  $0.5 \times 0.5$   $\text{cm}^2$ ). (b) Normal Raman signal acquired by dropping 5  $\mu\text{l}$  thiram ethanol solution ( $10^{-2}$  M) on a silicon substrate (area:  $0.5 \times 0.5$   $\text{cm}^2$ ). The SERS detection parameters: integration time: 5 s, power of the excitation laser: 1.25 mW.

The enhancement factor (EF) of hexagonally patterned flower-shaped Au@Ag NP

arrays was calculated by the equation:

$$EF = (I_{SERS} / N_{SERS}) / (I_{normal} / N_{normal})$$

Where  $I_{SERS}$  and  $I_{normal}$  are the intensity of  $1380\text{ cm}^{-1}$  peak acquired from thiram (concentration of  $10^{-7}\text{ M}$ ) with hexagonally patterned flower-shaped Au@Ag NP arrays and the normal intensity obtained from thiram (concentration of  $10^{-2}\text{ M}$ ) without the hexagonally patterned flower-shaped Au@Ag NP arrays, respectively.  $N_{SERS}$  and  $N_{normal}$  are the number of probe thiram molecules being sampled in the SERS and normal Raman detections, respectively. Herein,  $I_{SERS}$  (10449.43 counts) and  $I_{normal}$  (103.05 counts) could be observed from the spectra directly while  $N_{SERS}$  and  $N_{normal}$  need to be calculated.

Assume that the laser can completely penetrate the metal nanostructures and the  $5\text{ }\mu\text{L}$  drop of thiram molecules dropped onto the substrates were fully adsorbed. Therefore, the number of probe molecules being illuminated by the laser can be calculated as :

$$N_{SERS} = 5 \times 10^{-6} \text{L} \times 10^{-7} \text{mol/L} \times 6.02 \times 10^{23} \text{mol}^{-1} \times \left\{ \frac{\pi \frac{d^2}{4}}{a^2} \right\} = 9456$$

$$N_{normal} = 5 \times 10^{-6} \text{L} \times 10^{-2} \text{mol/L} \times 6.02 \times 10^{23} \text{mol}^{-1} \times \left\{ \frac{\pi \frac{d^2}{4}}{a^2} \right\} = 9.456 \times 10^8$$

where the diameter of the laser spot ( $d$ ) is about  $1\text{ }\mu\text{m}$ ;  $a$  is the length of side of substrates,  $a=5\text{ mm}$ .

Therefore,

$$EF = (I_{SERS} / N_{SERS}) / (I_{normal} / N_{normal}) = 1.01 \times 10^7.$$

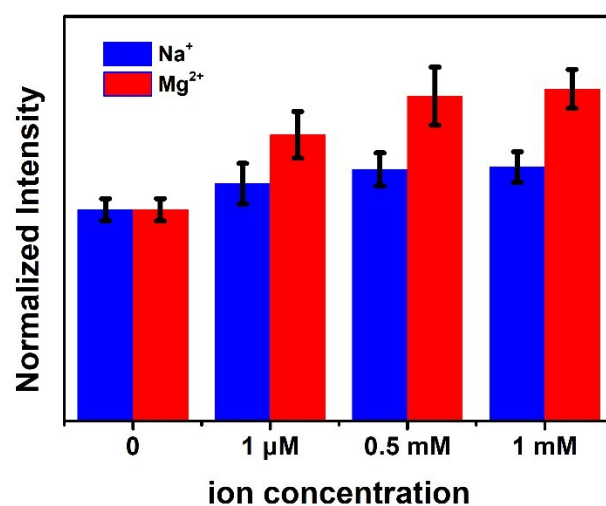

**Fig. S7** Effect of inorganic salt ions  $\text{Na}^+$  and  $\text{Mg}^{2+}$  concentration on the detection of thiram.

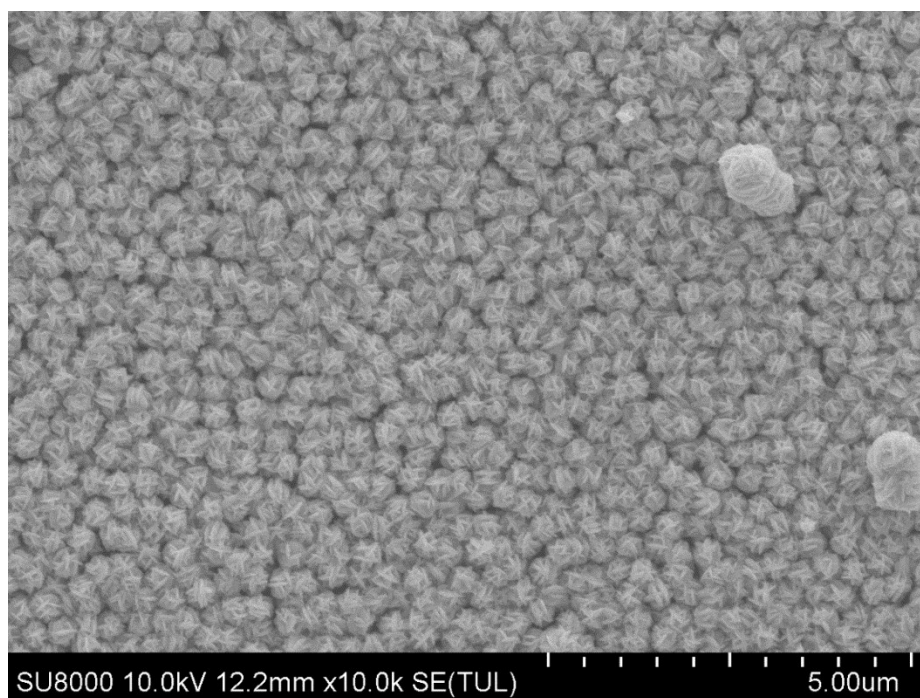

**Fig. S8** SEM image of the hexagonally patterned flower-shaped Au@Ag NP arrays with the periodicity of 350 nm.

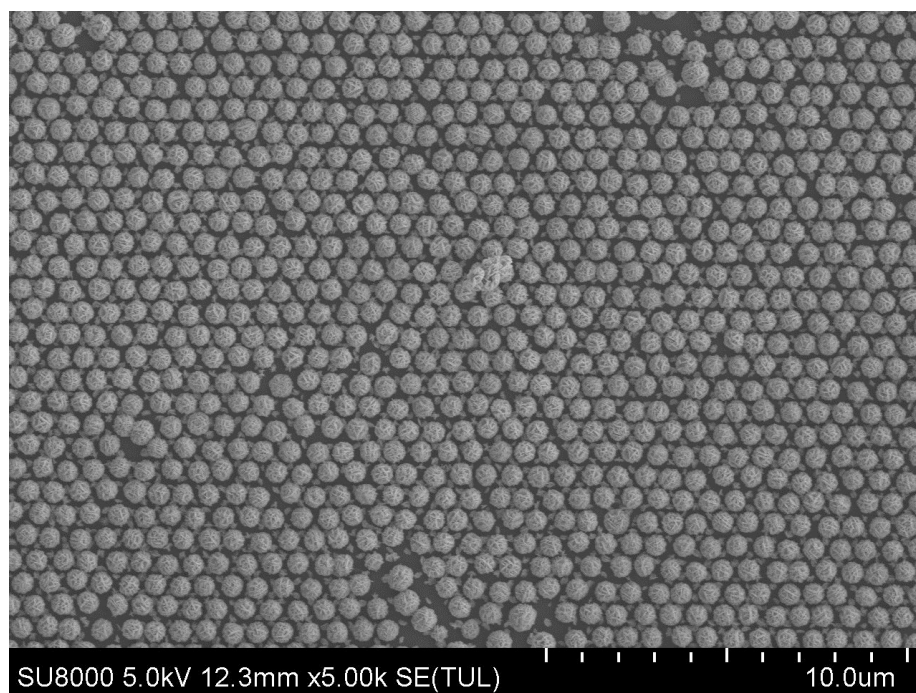

**Fig. S9** SEM image of the hexagonally patterned flower-shaped Au@Ag NP arrays with the periodicity of 750 nm.

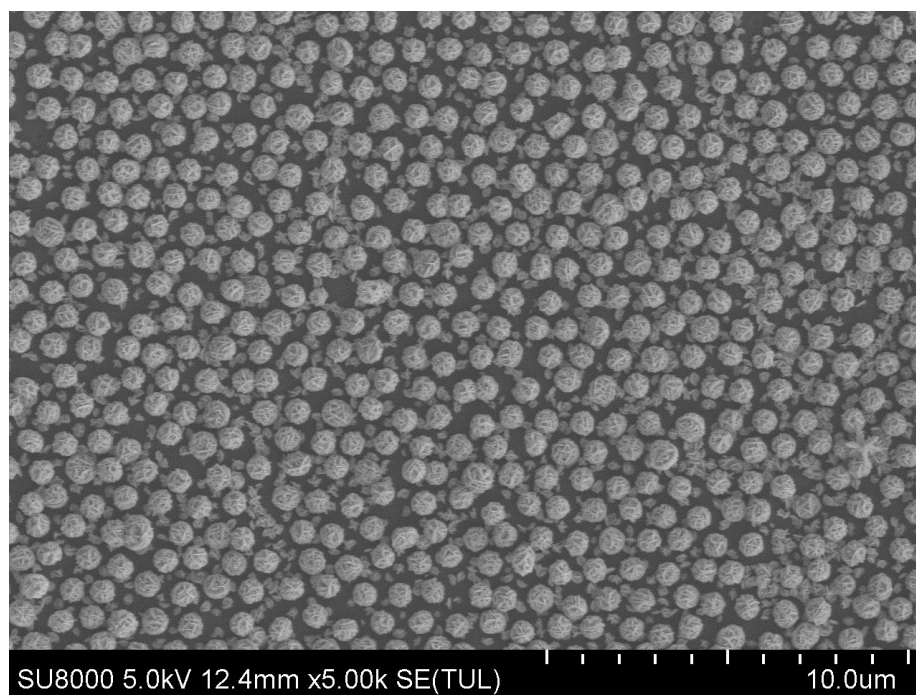

**Fig. S10** SEM image of the hexagonally patterned flower-shaped Au@Ag NP arrays with the periodicity of 1000 nm.

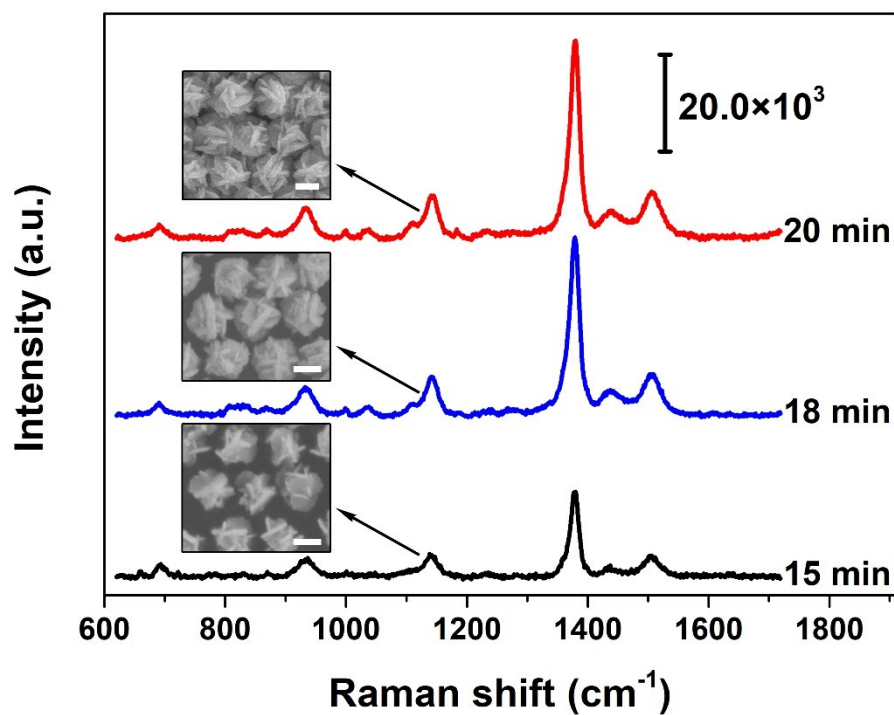

**Fig. S11** Raman spectra of 10<sup>-7</sup> M thiram on the hexagonally patterned flower-shaped Au@Ag NP arrays (350 nm in periodicity) with different growth time (15, 18 and 20 min). Insets: corresponding SEM images. Scale bars in insets: 200 nm.
